# Supplementary material
Source: publisher figshare collection journal article supplement (https://rs.figshare.com/ndownloader/files/13574102)
Supplement: Supplementary file [file 13574102]

## A-Amylase immobilization on amidoximated acrylic microfibers activated by cyanuric chloride

Yaaser Q. Almulaiky<sup>1,2</sup>, Faisal M. Aqlan<sup>3</sup>, Musab Aldhahri<sup>4,5</sup>, Mohammed Baeshen<sup>6</sup> Tariq Jamal Khan<sup>7</sup>, Khalid A. Khan<sup>8</sup>, Mohamed Afifi<sup>6,9</sup>, Ammar AL-Farga<sup>1</sup>, Mohiuddin Khan Warsi<sup>1</sup>, Mohammed Alkaled<sup>6</sup>, Aisha A.M. Alayafi<sup>6</sup>

<sup>1</sup>Department of Biochemistry, Faculty of Science, University of Jeddah, Jeddah, Saudi Arabia

<sup>2</sup>Chemistry Department, Faculty of Applied Science, Taiz University, Taiz, Yemen

<sup>3</sup>Chemistry Department, Faculty of Science, University of Jeddah, Jeddah, Saudi Arabia

<sup>4</sup>Department of Biochemistry, Faculty of Science, King Abdulaziz University, Jeddah, Saudi Arabia

<sup>5</sup>Center of Nanotechnology, King Abdulaziz University, Jeddah, Saudi Arabia

<sup>6</sup>Department of biology, Faculty of Science, University of Jeddah, Jeddah, Saudi Arabia

<sup>7</sup>Stem Cell P2 Laboratory, The Center for Reproductive Medicine, Shantou University Medical College, Shantou, 515041, People's Republic of China

<sup>8</sup>Chemistry Department, Faculty of Science, King Abdulaziz University, Jeddah, Saudi Arabia

<sup>9</sup>Biochemistry Department, Faculty of Veterinary Medicine, Zagazig University, Egypt

### Supplementary Table 2

substrate specificity of soluble and immobilized  $\alpha$ -amylase.

The activity with starch as the substrate is regarded as 100% activity.

| Substrate               | soluble<br>$\alpha$ -amylase | OD at 560<br>nm<br>n/3 | Immobilized<br>$\alpha$ -amylase | OD at<br>560 nm<br>n/3 |
|-------------------------|------------------------------|------------------------|----------------------------------|------------------------|
|                         | Residual<br>activity %       |                        | Residual<br>activity %           |                        |
| Starch                  | 100                          | 1.231                  | 100                              | 0.769                  |
| Glycogen                | 81                           | 0.997                  | 90                               | 0.692                  |
| Amylopectin             | 61                           | 0.751                  | 86                               | 0.661                  |
| Alpha-<br>cyclodextrine | 40                           | 0.493                  | 48                               | 0.369                  |
| Beta-<br>cyclodextrine  | 26                           | 0.320                  | 65                               | 0.499                  |
| amylose                 | 17                           | 0.209                  | 28                               | 0.215                  |
